# Supplementary material for: Prebiotic activities of dextran from Leuconostoc mesenteroides SPCL742 analyzed in the aspect of the human gut microbial ecosystem
Source: Royal Society of Chemistry journal article supplement (doi:10.1039/d1fo03287a), 2022-01-01
Supplement: d1fo03287a2.pdf [file d1fo03287a2.pdf]

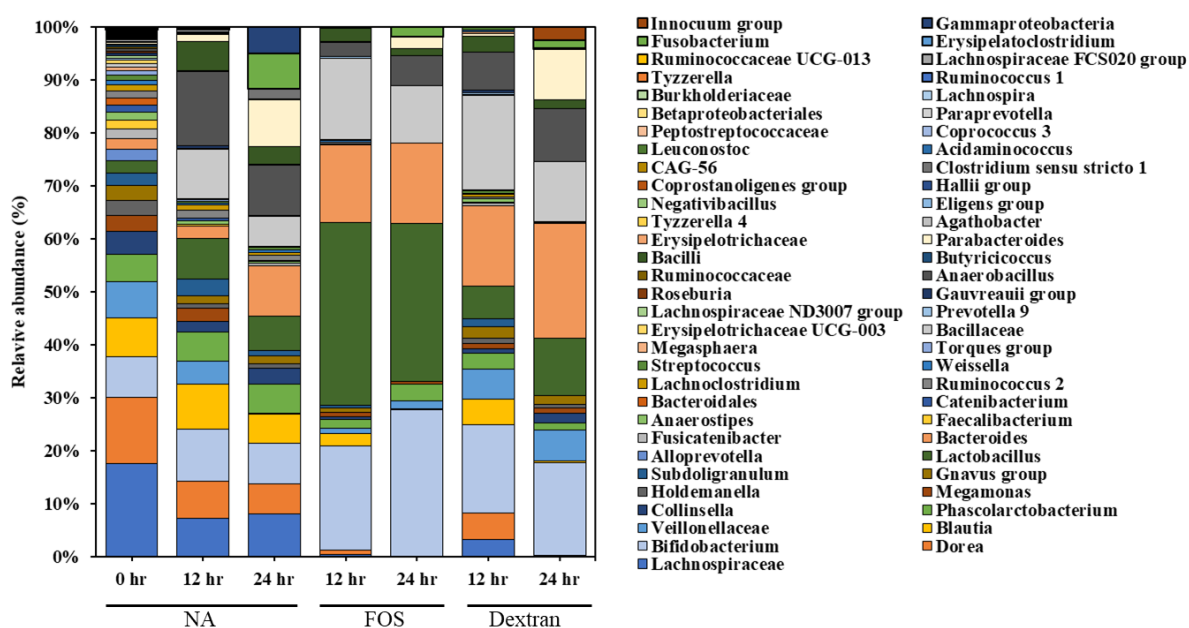

**Supplementary Figure 2.** Bacterial taxonomic compositions at genus level after *in vitro* fecal fermentation. NA, no substrate addition; FOS, addition of fructooligosaccharide; Dextran, addition of *Leuconostoc mesenteroides* SPLC742 dextran.
