# Supplementary material for: Prebiotic activities of dextran from Leuconostoc mesenteroides SPCL742 analyzed in the aspect of the human gut microbial ecosystem
Source: Royal Society of Chemistry journal article supplement (doi:10.1039/d1fo03287a), 2022-01-01
Supplement: d1fo03287a3.pdf [file d1fo03287a3.pdf]

**Supplementary Table 1.** Molecular weight, retention time, and size-exclusion chromatography of standard dextrans for molecular weight analysis of *Leuconostoc mesenteroides* SPCL 742 dextran

|         | Molecular weight (Da) | Retention time (min) | Chromatograph |
|---------|-----------------------|----------------------|---------------|
| Dextran | $6.10 \times 10^6$    | 24.58                |               |
| P-800   | $7.36 \times 10^5$    | 28.46                |               |
| P-400   | $3.43 \times 10^5$    | 29.83                |               |

Cont. Supplementary Table 1.

|       | Molecular weight (Da) | Retention time (min) | Chromatograph |
|-------|-----------------------|----------------------|---------------|
| P-200 | $2.02 \times 10^5$    | 31.03                |               |
| P-10  | $9.90 \times 10^3$    | 35.27                |               |
| P-5   | $6.60 \times 10^3$    | 35.84                |               |

Cont. Supplementary Table 1.

Molecular weight (Da)    Retention time (min)

Chromatograph

LM742 dextran     $1.39 \times 10^6$     27.35

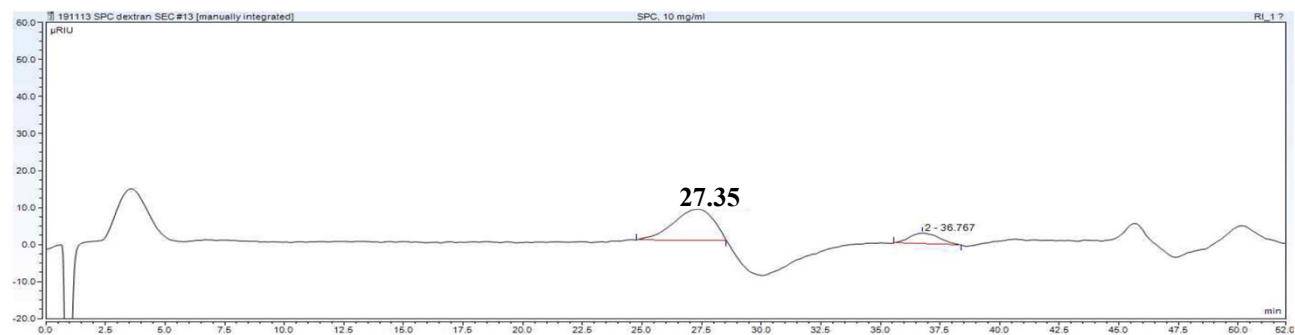

## ARTICLE

**Supplementary Table 2.** Quantified metabolites in *in vitro* fecal fermentation of *Leuconostoc mesenteroides* SPLC742 dextran and fructo-oligosaccharides (FOS) after 12 and 24 h analysed by <sup>1</sup>H-NMR

| Group                | Metabolite                    | NA (mM)                   |                           |                           | FOS (mM)                 |                          | Dextran (mM)             |                          |
|----------------------|-------------------------------|---------------------------|---------------------------|---------------------------|--------------------------|--------------------------|--------------------------|--------------------------|
|                      |                               | 0 hr                      | 12 hr                     | 24 hr                     | 12 hr                    | 24 hr                    | 12 hr                    | 24 hr                    |
| Organic acid         | 2-Aminobutyrate               | 0.19±0.009 <sup>d</sup>   | 0.48±0.01 <sup>bc</sup>   | 0.69±0.019 <sup>a</sup>   | 0.56±0.056 <sup>4</sup>  | 0.19±0.056 <sup>d</sup>  | 0.44±0.029 <sup>c</sup>  | 0.45±0.034 <sup>c</sup>  |
|                      | 4-Aminobutyrate               | 0.18±0.014 <sup>b</sup>   | 0.28±0.017 <sup>a</sup>   | 0.1±0.003 <sup>c</sup>    | 0.26±0.007 <sup>a</sup>  | 0.18±0.007 <sup>b</sup>  | 0.19±0.011 <sup>b</sup>  | 0.15±0.03 <sup>b</sup>   |
|                      | Acetate                       | 0.57±0.02 <sup>f</sup>    | 2.86±0.03 <sup>e</sup>    | 5.77±0.024 <sup>d</sup>   | 8.46±0.111 <sup>c</sup>  | 27.34±0.111 <sup>a</sup> | 5.09±0.132 <sup>d</sup>  | 22.28±1.405 <sup>b</sup> |
|                      | Butyrate                      | 0.07±0.006 <sup>c</sup>   | 0.26±0.009 <sup>b</sup>   | 0.78±0.135 <sup>a</sup>   | 0.3±0.006 <sup>b</sup>   | 0.72±0.006 <sup>a</sup>  | 0.29±0.017 <sup>b</sup>  | 0.64±0.01 <sup>a</sup>   |
|                      | Isobutyrate                   | 0.23±0.03 <sup>a</sup>    | 0.08±0.01 <sup>a</sup>    | 0.1±0.004 <sup>a</sup>    | 0.15±0.013 <sup>a</sup>  | 0.08±0.013 <sup>a</sup>  | 0.26±0.018 <sup>a</sup>  | 0.22±0.277 <sup>a</sup>  |
|                      | Isovalerate                   | 0.33±0.027 <sup>a</sup>   | 0.22±0.003 <sup>cd</sup>  | 0.21±0.037 <sup>d</sup>   | 0.32±0.008 <sup>ab</sup> | 0.11±0.008 <sup>e</sup>  | 0.27±0.003 <sup>b</sup>  | 0.13±0.016 <sup>e</sup>  |
|                      | Propionate                    | 0.2±0.002 <sup>c</sup>    | 0.34±0.008 <sup>c</sup>   | 0.46±0.34 <sup>c</sup>    | 0.17±0.003 <sup>c</sup>  | 2.31±0.003 <sup>b</sup>  | 0.14±0.031 <sup>c</sup>  | 4.78±0.279 <sup>a</sup>  |
|                      | Valerate                      | 0.02±0.002 <sup>c</sup>   | 0.14±0.019 <sup>c</sup>   | 0.37±0.105 <sup>b</sup>   | 0.33±0.017 <sup>b</sup>  | 0.28±0.017 <sup>b</sup>  | 0.05±0.008 <sup>c</sup>  | 0.54±0.035 <sup>4</sup>  |
| Indole derivatives   | 5-Hydroxyindole-3-acetate     | 0.02±0.002 <sup>cd</sup>  | 0.01±0.001 <sup>de</sup>  | 0.02±0.002 <sup>c</sup>   | 0.07±0.002 <sup>a</sup>  | 0.01±0.002 <sup>de</sup> | 0.04±0.004 <sup>b</sup>  | 0.01±0.001 <sup>e</sup>  |
|                      | Indole-3-acetate              | 0.02±0.005 <sup>bc</sup>  | 0.02±0.002 <sup>bc</sup>  | 0.03±0.005 <sup>ab</sup>  | 0.02±0.004 <sup>c</sup>  | 0.01±0.004 <sup>c</sup>  | 0.03±0.004 <sup>a</sup>  | 0.01±0.001 <sup>c</sup>  |
|                      | Indole-3-lactate              | 0.02±0.002 <sup>a</sup>   | 0.02±0.001 <sup>a</sup>   | 0.02±0.001 <sup>a</sup>   | 0.02±0.003 <sup>a</sup>  | 0.02±0.003 <sup>a</sup>  | 0.02±0.005 <sup>a</sup>  | 0.01±0.002 <sup>b</sup>  |
| Choline metabolites  | Betaine                       | 0.25±0.002 <sup>ab</sup>  | 0.27±0.007 <sup>ab</sup>  | 0.23±0.019 <sup>ab</sup>  | 0.26±0.002 <sup>b</sup>  | 0.19±0.048 <sup>ab</sup> | 0.19±0.011 <sup>b</sup>  | 0.35±0.019 <sup>a</sup>  |
|                      | Choline                       | 0.05±0.009 <sup>a</sup>   | 0.03±0.002 <sup>b</sup>   | 0.01±0.002 <sup>c</sup>   | 0.02±0.001 <sup>bc</sup> | 0.02±0.001 <sup>bc</sup> | 0.02±0.004 <sup>bc</sup> | 0.02±0.006 <sup>bc</sup> |
|                      | Trimethylamine (TMA)          | 0.01±0.001 <sup>c</sup>   | 0.02±0.002 <sup>ab</sup>  | 0.06±0.001 <sup>abc</sup> | 0.03±0.001 <sup>bc</sup> | 0.04±0.007 <sup>bc</sup> | 0.03±0.000 <sup>c</sup>  | 0.02±0.001 <sup>a</sup>  |
|                      | Trimethylamine N-oxide (TMAO) | 0.01±0.001 <sup>ab</sup>  | 0.01±0.001 <sup>b</sup>   | 0.01±0.001 <sup>ab</sup>  | 0.01±0.001 <sup>b</sup>  | 0.01±0.001 <sup>ab</sup> | 0.01±0.001 <sup>b</sup>  | 0.02±0.007 <sup>a</sup>  |
| Phenolic derivatives | 2-Hydroxyphenylacetate        | 0.03±0.001 <sup>a</sup>   | 0.02±0.002 <sup>a</sup>   | 0.03±0.029 <sup>a</sup>   | 0.02±0.002 <sup>a</sup>  | 0.01±0.002 <sup>a</sup>  | 0.02±0.008 <sup>a</sup>  | 0.11±0.134 <sup>a</sup>  |
|                      | 2-Phenylpropionate            | 0.07±0.001 <sup>a</sup>   | 0.06±0.006 <sup>b</sup>   | 0.08±0.007 <sup>a</sup>   | 0.06±0.002 <sup>b</sup>  | 0.03±0.002 <sup>c</sup>  | 0.05±0.007 <sup>b</sup>  | 0.02±0.005 <sup>c</sup>  |
|                      | 3-Phenylpropionate            | 0.03±0.002 <sup>b</sup>   | 0.02±0.002 <sup>c</sup>   | 0.04±0.003 <sup>a</sup>   | 0.03±0.003 <sup>b</sup>  | 0.01±0.003 <sup>c</sup>  | 0.04±0.003 <sup>a</sup>  | 0.04±0.003 <sup>a</sup>  |
|                      | 4-Hydroxyphenylacetate        | 0.02±0.004 <sup>b</sup>   | 0.01±0.002 <sup>c</sup>   | 0.02±0.002 <sup>bc</sup>  | 0.06±0.005 <sup>a</sup>  | 0.02±0.005 <sup>bc</sup> | 0.02±0.007 <sup>bc</sup> | 0.02±0.003 <sup>bc</sup> |
|                      | Phenylacetate                 | 0.04±0.002 <sup>abc</sup> | 0.04±0.005 <sup>abc</sup> | 0.03±0.001 <sup>bc</sup>  | 0.02±0.004 <sup>c</sup>  | 0.02±0.004 <sup>c</sup>  | 0.05±0.002 <sup>a</sup>  | 0.04±0.023 <sup>ab</sup> |

Cont. Supplementary Table 2.

|             |                         | NA (mM)                  |                          |                          | FOS (mM)                 |                          | Dextran (mM)             |                          |
|-------------|-------------------------|--------------------------|--------------------------|--------------------------|--------------------------|--------------------------|--------------------------|--------------------------|
|             |                         | 0 hr                     | 12 hr                    | 24 hr                    | 12 hr                    | 24 hr                    | 12 hr                    | 24 hr                    |
| Vitamins    | Riboflavin (B2)         | 0.01±0.002 <sup>b</sup>  | 0.01±0.001 <sup>b</sup>  | 0.05±0.008 <sup>a</sup>  | 0.02±0.002 <sup>b</sup>  | 0.02±0.002 <sup>b</sup>  | 0.02±0.007 <sup>b</sup>  | 0.01±0.002 <sup>b</sup>  |
|             | Niacinamide (B3)        | 0.02±0.004 <sup>ab</sup> | 0.02±0.002 <sup>ab</sup> | 0.01±0.001 <sup>b</sup>  | 0.01±0.001 <sup>ab</sup> | 0.01±0.001 <sup>b</sup>  | 0.02±0.009 <sup>a</sup>  | 0.01±0.001 <sup>ab</sup> |
|             | Pyridoxine (B6)         | 0.02±0.002 <sup>b</sup>  | 0.02±0.001 <sup>b</sup>  | 0.01±0.002 <sup>c</sup>  | 0.02±0.003 <sup>b</sup>  | 0.01±0.003 <sup>c</sup>  | 0.03±0.003 <sup>a</sup>  | 0.02±0.001 <sup>b</sup>  |
|             | Pantothenic acid (B5)   | 0.07±0.005 <sup>bc</sup> | 0.02±0.002 <sup>d</sup>  | 0.05±0.003 <sup>cd</sup> | 0.04±0.002 <sup>cd</sup> | 0.1±0.002 <sup>ab</sup>  | 0.13±0.032 <sup>a</sup>  | 0.1±0.029 <sup>ab</sup>  |
|             | Biotin (B7)             | 0.07±0.013 <sup>bc</sup> | 0.07±0.002 <sup>c</sup>  | 0.04±0.01 <sup>d</sup>   | 0.1±0.004 <sup>ab</sup>  | 0.12±0.004 <sup>a</sup>  | 0.12±0.014 <sup>a</sup>  | 0.02±0.002 <sup>d</sup>  |
| Polyamines  | Putrescine              | 0.03±0.004 <sup>d</sup>  | 0.13±0.006 <sup>a</sup>  | 0.12±0.007 <sup>a</sup>  | 0.06±0.006 <sup>c</sup>  | 0.05±0.006 <sup>c</sup>  | 0.05±0.008 <sup>c</sup>  | 0.1±0.004 <sup>b</sup>   |
| Amino acids | Alanine                 | 0.77±0.003 <sup>bc</sup> | 0.87±0.029 <sup>ab</sup> | 0.53±0.013 <sup>d</sup>  | 0.96±0.025 <sup>a</sup>  | 0.33±0.025 <sup>e</sup>  | 0.73±0.094 <sup>c</sup>  | 0.72±0.044 <sup>c</sup>  |
|             | Carnitine               | 0.15±0.182 <sup>a</sup>  | 0.03±0.002 <sup>a</sup>  | 0.03±0.016 <sup>a</sup>  | 0.01±0.001 <sup>a</sup>  | 0.01±0.001 <sup>a</sup>  | 0.01±0.001 <sup>a</sup>  | 0.1±0.01 <sup>a</sup>    |
|             | Cysteine                | 0.04±0.009 <sup>c</sup>  | 0.07±0.008 <sup>bc</sup> | 0.47±0.028 <sup>a</sup>  | 0.03±0.002 <sup>c</sup>  | 0.1±0.002 <sup>bc</sup>  | 0.14±0.004 <sup>b</sup>  | 0.07±0.034 <sup>bc</sup> |
|             | Glutamate               | 0.66±0.033 <sup>cd</sup> | 0.84±0.053 <sup>bc</sup> | 0.36±0.024 <sup>c</sup>  | 0.86±0.046 <sup>b</sup>  | 1.2±0.046 <sup>a</sup>   | 0.76±0.05 <sup>bcd</sup> | 0.65±0.015 <sup>d</sup>  |
|             | Histidine               | 0.08±0.007 <sup>a</sup>  | 0.02±0.01 <sup>bc</sup>  | 0.03±0.001 <sup>b</sup>  | 0.03±0.011 <sup>b</sup>  | 0.01±0.011 <sup>bc</sup> | 0.02±0.004 <sup>bc</sup> | 0.01±0.001 <sup>c</sup>  |
|             | Isoleucine              | 0.38±0.004 <sup>b</sup>  | 0.46±0.004 <sup>a</sup>  | 0.39±0.018 <sup>b</sup>  | 0.28±0.014 <sup>c</sup>  | 0.09±0.014 <sup>d</sup>  | 0.42±0.011 <sup>ab</sup> | 0.14±0.027 <sup>d</sup>  |
|             | Leucine                 | 0.54±0.006 <sup>a</sup>  | 0.55±0.004 <sup>a</sup>  | 0.34±0.15 <sup>bc</sup>  | 0.3±0.011 <sup>bc</sup>  | 0.11±0.011 <sup>d</sup>  | 0.42±0.006 <sup>ab</sup> | 0.19±0.01 <sup>cd</sup>  |
|             | Lysine                  | 0.27±0.01 <sup>a</sup>   | 0.12±0.008 <sup>bc</sup> | 0.14±0.042 <sup>b</sup>  | 0.13±0.011 <sup>bc</sup> | 0.15±0.011 <sup>b</sup>  | 0.08±0.005 <sup>cd</sup> | 0.03±0.002 <sup>d</sup>  |
|             | Methionine              | 0.13±0.001 <sup>a</sup>  | 0.06±0.007 <sup>b</sup>  | 0.05±0.002 <sup>b</sup>  | 0.04±0.047 <sup>b</sup>  | 0.02±0.047 <sup>b</sup>  | 0.06±0.003 <sup>b</sup>  | 0.04±0.003 <sup>b</sup>  |
|             | Phenylalanine           | 0.07±0.075 <sup>a</sup>  | 0.05±0.002 <sup>a</sup>  | 0.03±0.004 <sup>a</sup>  | 0.05±0.004 <sup>a</sup>  | 0.01±0.004 <sup>a</sup>  | 0.04±0.001 <sup>a</sup>  | 0.06±0.029 <sup>a</sup>  |
|             | Serine                  | 0.88±0.021 <sup>c</sup>  | 0.88±0.018 <sup>c</sup>  | 0.75±0.015 <sup>d</sup>  | 1.25±0.093 <sup>b</sup>  | 0.43±0.093 <sup>e</sup>  | 3.32±0.021 <sup>a</sup>  | 0.76±0.01 <sup>d</sup>   |
| Tyrosine    | 0.06±0.001 <sup>a</sup> | 0.02±0.004 <sup>b</sup>  | 0.02±0.003 <sup>b</sup>  | 0.02±0.003 <sup>b</sup>  | 0.02±0.003 <sup>b</sup>  | 0.02±0.003 <sup>b</sup>  | 0.02±0.004 <sup>b</sup>  |                          |

\* Different letters reveal significant changes determined by ANOVA test ( $P < 0.05$ ).
